# Supplementary material for: Discordance Between Human Papillomavirus Twitter Images and Disparities in Human Papillomavirus Risk and Disease in the United States: Mixed-Methods Analysis
Source: PubMed Central journal article supplement (PMC6231890; doi:10.2196/10244), 2018-09-14
Supplement: jmir_v20i9e10244_app2.pdf [file jmir_v20i9e10244_app2.pdf]

# Discordance between HPV Twitter Images and Disparities in HPV Risk and Disease: Mixed Methods Analysis

## Multimedia Appendix 2

Table 1: The gender, age, and race distribution in different source group by manual annotation.

|              |       | Government-health user |     |      |     |     | Organization-health user |      |     |     |     | Organization-news user |     |      |    |      | Individuals (any topic) |     |     |     |     |
|--------------|-------|------------------------|-----|------|-----|-----|--------------------------|------|-----|-----|-----|------------------------|-----|------|----|------|-------------------------|-----|-----|-----|-----|
| Gender       | Age   | T(#)                   | B   | W    | A   | AM  | T(#)                     | B    | W   | A   | AM  | T(#)                   | B   | W    | A  | AM   | T(#)                    | B   | W   | A   | AM  |
| Female       | youth | 24                     | 25% | 42%  | 13% | 21% | 38                       | 18%  | 63% | 3%  | 16% | 29                     | 3%  | 97%  | 0% | 0%   | 55                      | 6%  | 80% | 2%  | 13% |
|              | adult | 20                     | 20% | 55%  | 15% | 10% | 49                       | 14%  | 61% | 6%  | 18% | 37                     | 5%  | 78%  | 5% | 11%  | 62                      | 21% | 63% | 7%  | 10% |
| Male         | youth | 15                     | 0%  | 80%  | 0%  | 20% | 3                        | 100% | 0%  | 0%  | 0%  | 1                      | 0%  | 0%   | 0% | 100% | 7                       | 29% | 71% | 0%  | 0%  |
|              | adult | 1                      | 0%  | 100% | 0%  | 0%  | 14                       | 0%   | 79% | 14% | 7%  | 12                     | 0%  | 100% | 0% | 0%   | 30                      | 3%  | 47% | 0%  | 50% |
| Both genders | youth | 92                     | 12% | 55%  | 2%  | 30% | 96                       | 8%   | 71% | 6%  | 15% | 10                     | 10% | 60%  | 0% | 30%  | 50                      | 10% | 64% | 2%  | 24% |
|              | adult | 62                     | 5%  | 89%  | 0%  | 7%  | 30                       | 3%   | 83% | 7%  | 7%  | 9                      | 22% | 78%  | 0% | 0%   | 52                      | 2%  | 54% | 15% | 29% |

T: Total.  
 B: Black.  
 W: White.  
 A: Asian.  
 AM: Ambiguous.
